# Supplementary material for: Musculoskeletal disorders and complaints in professional musicians: a systematic review of prevalence, risk factors, and clinical treatment effects
Source: PubMed Central journal article supplement (PMC7007903; doi:10.1007/s00420-019-01467-8), 2019-09-03
Supplement: 420_2019_1467_MOESM1_ESM.pdf [file 420_2019_1467_MOESM1_ESM.pdf]

## Quality Assessment Tool Case Control Studies

| Rater Initials and Rater Number (#1 or #2):                               |                                                                                                                                                                                                            |     |    |                |
|---------------------------------------------------------------------------|------------------------------------------------------------------------------------------------------------------------------------------------------------------------------------------------------------|-----|----|----------------|
| Study identification (Author, Title, Year of Publication, Journal Title): |                                                                                                                                                                                                            |     |    |                |
|                                                                           | Criteria                                                                                                                                                                                                   | Yes | No | Not applicable |
| 1.                                                                        | Did the authors use an appropriate method to answer their question? (i.e., the right study design)                                                                                                         |     |    |                |
| 2.                                                                        | Was the research question or objective in this paper clearly stated?                                                                                                                                       |     |    |                |
| 3.                                                                        | Was the study population clearly specified and defined?                                                                                                                                                    |     |    |                |
| 4.                                                                        | Did the authors include a sample size justification?                                                                                                                                                       |     |    |                |
| 5.                                                                        | Were controls selected or recruited from the same or similar population that gave rise to the cases (including the same timeframe)?                                                                        |     |    |                |
| 6.                                                                        | Were the definitions, inclusion and exclusion criteria, algorithms or processes used to identify or select cases and controls valid, reliable, and implemented consistently across all study participants? |     |    |                |
| 7.                                                                        | Were the cases clearly defined and differentiated from controls?                                                                                                                                           |     |    |                |
| 8.                                                                        | If less than 100 percent of eligible cases and/or controls were selected for the study, were the cases and/or controls randomly selected from those eligible?                                              |     |    |                |
| 9.                                                                        | Was there use of concurrent controls?                                                                                                                                                                      |     |    |                |
| 10.                                                                       | Were the investigators able to confirm that the exposure/risk occurred prior to the development of the condition or event that defined a participant as a case?                                            |     |    |                |
| 11.                                                                       | Were the measures of exposure/risk clearly defined, valid, reliable, and implemented consistently (including the same time period) across all study participants?                                          |     |    |                |
| 12.                                                                       | Were the assessors of exposure/risk blinded to the case or control status of participants?                                                                                                                 |     |    |                |
| 13.                                                                       | Were key potential confounding variables measured and adjusted statistically in the analyses? If matching was used, did the investigators account for matching during study analysis?                      |     |    |                |
| 14.                                                                       | Have confidence intervals or standard deviations/standard errors been provided?                                                                                                                            |     |    |                |
| Quality Rating                                                            |                                                                                                                                                                                                            |     |    |                |
| Total Points Rater #1:                                                    |                                                                                                                                                                                                            |     |    |                |
| Total Points Rater #2:                                                    |                                                                                                                                                                                                            |     |    |                |
| Total Points Consensus Decision:                                          |                                                                                                                                                                                                            |     |    |                |
| Additional Comments:                                                      |                                                                                                                                                                                                            |     |    |                |
