# Supplementary material for: Musculoskeletal disorders and complaints in professional musicians: a systematic review of prevalence, risk factors, and clinical treatment effects
Source: PubMed Central journal article supplement (PMC7007903; doi:10.1007/s00420-019-01467-8), 2019-09-03
Supplement: 420_2019_1467_MOESM3_ESM.pdf [file 420_2019_1467_MOESM3_ESM.pdf]

## Quality Assessment Tool Controlled Intervention Studies

| Rater Initials and Rater Number (#1 or #2):                               |                                                                                                                                                                  |     |    |                |
|---------------------------------------------------------------------------|------------------------------------------------------------------------------------------------------------------------------------------------------------------|-----|----|----------------|
| Study identification (Author, Title, Year of Publication, Journal Title): |                                                                                                                                                                  |     |    |                |
|                                                                           | Criteria                                                                                                                                                         | Yes | No | Not applicable |
| 1.                                                                        | Did the authors use an appropriate method to answer their question? (i.e., the right study design)                                                               |     |    |                |
| 2.                                                                        | Was the research question or objective in this paper clearly stated?                                                                                             |     |    |                |
| 3.                                                                        | Was the study described as randomized, a randomized trial, a randomized clinical trial, or an RCT?                                                               |     |    |                |
| 4.                                                                        | Was the method of randomization adequate (i.e., use of randomly generated assignment)?                                                                           |     |    |                |
| 5.                                                                        | Was the treatment allocation concealed (so that assignments could not be predicted)?                                                                             |     |    |                |
| 6.                                                                        | Were study participants and providers blinded to treatment group assignment?                                                                                     |     |    |                |
| 7.                                                                        | Were the people assessing the outcomes blinded to the participants' group assignments?                                                                           |     |    |                |
| 8.                                                                        | Were the groups similar at baseline on important characteristics that could affect outcomes (e.g., demographics, risk factors, co-morbid conditions)?            |     |    |                |
| 9.                                                                        | Was the overall drop-out rate from the study at endpoint 20% or lower of the number allocated to treatment?                                                      |     |    |                |
| 10.                                                                       | Was the differential drop-out rate (between treatment groups) at endpoint 15 percentage points or lower?                                                         |     |    |                |
| 11.                                                                       | Was there high adherence to the intervention protocols for each treatment group?                                                                                 |     |    |                |
| 12.                                                                       | Were other interventions avoided or similar in the groups (e.g., similar background treatments)?                                                                 |     |    |                |
| 13.                                                                       | Were outcomes assessed using valid and reliable measures, implemented consistently across all study participants?                                                |     |    |                |
| 14.                                                                       | Did the authors report that the sample size was sufficiently large to be able to detect a difference in the main outcome between groups with at least 80% power? |     |    |                |
| 15.                                                                       | Were outcomes reported or subgroups analyzed prespecified (i.e., identified before analyses were conducted)?                                                     |     |    |                |
| 16.                                                                       | Were all randomized participants analyzed in the group to which they were originally assigned, i.e., did they use an intention-to-treat analysis?                |     |    |                |
| 17.                                                                       | Have confidence intervals or standard deviations/standard errors been provided?                                                                                  |     |    |                |
| 18.                                                                       | Was the study carried out at only one site, or if not, are results comparable for all sites?                                                                     |     |    |                |
| Quality Rating                                                            |                                                                                                                                                                  |     |    |                |
| Total Points Rater #1:                                                    |                                                                                                                                                                  |     |    |                |
| Total Points Rater #2:                                                    |                                                                                                                                                                  |     |    |                |
| Total Points Consensus Decision:                                          |                                                                                                                                                                  |     |    |                |
| Additional Comments:                                                      |                                                                                                                                                                  |     |    |                |

Application: Yes: Count +1 Point; No: Count -1 Point; Not applicable: Count 0 Point; Not reported means No
