# Supplementary material for: Musculoskeletal disorders and complaints in professional musicians: a systematic review of prevalence, risk factors, and clinical treatment effects
Source: Springer Nature journal article supplement (doi:10.1007/s00420-019-01467-8), 2019-09-03
Supplement: MOESM4 [file 17132748]

### Quality Assessment Tool Before-After (Pre-Post) Studies With No Control Group

|                                                                           |                                                                                                                                                                                                                         |            |           |                       |
|---------------------------------------------------------------------------|-------------------------------------------------------------------------------------------------------------------------------------------------------------------------------------------------------------------------|------------|-----------|-----------------------|
| Rater Initials and Rater Number (#1 or #2):                               |                                                                                                                                                                                                                         |            |           |                       |
| Study identification (Author, Title, Year of Publication, Journal Title): |                                                                                                                                                                                                                         |            |           |                       |
|                                                                           | <b>Criteria</b>                                                                                                                                                                                                         | <b>Yes</b> | <b>No</b> | <b>Not applicable</b> |
| 1.                                                                        | Did the authors use an appropriate method to answer their question? (i.e., the right study design)                                                                                                                      |            |           |                       |
| 2.                                                                        | Was the study question or objective clearly stated?                                                                                                                                                                     |            |           |                       |
| 3.                                                                        | Were eligibility/selection criteria for the study population prespecified and clearly described?                                                                                                                        |            |           |                       |
| 4.                                                                        | Were the participants in the study representative of those who would be eligible for the test/service/intervention in the general or clinical population of interest?                                                   |            |           |                       |
| 5.                                                                        | Was the sample size sufficiently large to provide confidence in the findings?                                                                                                                                           |            |           |                       |
| 6.                                                                        | Were study participants and providers blinded to treatment group assignment?                                                                                                                                            |            |           |                       |
| 7.                                                                        | Was the test/service/intervention clearly described and delivered consistently across the study population?                                                                                                             |            |           |                       |
| 8.                                                                        | Were the outcome measures prespecified, clearly defined, valid, reliable, and assessed consistently across all study participants?                                                                                      |            |           |                       |
| 9.                                                                        | Were the people assessing the outcomes blinded to the participants' exposures/interventions?                                                                                                                            |            |           |                       |
| 10.                                                                       | Was the loss to follow-up after baseline 20% or less? Were those lost to follow-up accounted for in the analysis?                                                                                                       |            |           |                       |
| 11.                                                                       | Did the statistical methods examine changes in outcome measures from before to after the intervention? Were statistical tests done that provided p values for the pre-to-post changes?                                  |            |           |                       |
| 12.                                                                       | Were outcome measures of interest taken multiple times before the intervention and multiple times after the intervention (i.e., did they use an interrupted time-series design)?                                        |            |           |                       |
| 13.                                                                       | If the intervention was conducted at a group level (e.g., a whole hospital, a community, etc.) did the statistical analysis take into account the use of individual-level data to determine effects at the group level? |            |           |                       |
| 14.                                                                       | Have confidence intervals or standard deviations/standard errors been provided?                                                                                                                                         |            |           |                       |
| 15.                                                                       | Was the study carried out at only one site, or if not, are results comparable for all sites?                                                                                                                            |            |           |                       |
|                                                                           | <b>Quality Rating</b>                                                                                                                                                                                                   |            |           |                       |
| <b>Total Points Rater #1:</b>                                             |                                                                                                                                                                                                                         |            |           |                       |
| <b>Total Points Rater #2:</b>                                             |                                                                                                                                                                                                                         |            |           |                       |
| <b>Total Points Consensus Decision:</b>                                   |                                                                                                                                                                                                                         |            |           |                       |
| <b>Additional Comments:</b>                                               |                                                                                                                                                                                                                         |            |           |                       |

Application: Yes: Count +1 Point; No: Count -1 Point; Not applicable: Count 0 Point; Not reported means No
